# Supplementary material
Source: publisher figshare collection journal article supplement (https://gsajournals.figshare.com/ndownloader/files/24776729)
Supplement: Supplementary file 1 [file 24776729]

## Sheet: TableS3
Table S3 Ranges for the number of genes and SNPs in 1000 null gene groups for each pathway. For each pathway, null gene groups were sampled by excluding SNPs within the pathway.
	Number of genes		Number of SNPs
pathway	minimum	maximum	minimum	maximum
aa_degradation	108	177	1080	1172
aa_synthesis	225	327	2068	2150
aa_transport	88	159	931	1017
degradation_ubiquitin	1924	2129	15866	16000
e_alt_oxidase	3	21	66	143
flavonoids	104	168	1054	1118
glycolysis	85	144	850	927
isoprenoids	189	269	1769	1859
N_containing	18	49	229	304
phenylpropanoids	84	139	839	909
protein_aa_activation	125	194	1223	1285
protein_assembly	25	65	310	392
protein_degradation	739	885	6363	6470
protein_folding	72	138	809	867
protein_glyco	40	81	452	529
protein_postrans	1030	1211	8725	8835
protein_synthesis	854	1023	7231	7342
protein_targeting	417	530	3670	3738
S_containing	70	119	725	800
tca_cycle	95	159	916	1003
